# Supplementary material for: Relationship between Serum Bortezomib Concentration and Emergence of Diarrhea in Patients with Multiple Myeloma and/or AL Amyloidosis
Source: MDPI journal article supplement (doi:10.3390/cancers13225674), 2021-11-12
Supplement: s1 [file s1]

**Supplementary Table S1.** Intra-day and inter-days variabilities of measurement method.

| Theoretical value<br>(ng mL <sup>-1</sup> ) | Intra-day variability (n=6)              |                  |                 | Inter-days variability (n=5)             |                  |                 |
|---------------------------------------------|------------------------------------------|------------------|-----------------|------------------------------------------|------------------|-----------------|
|                                             | Measured value<br>(ng mL <sup>-1</sup> ) | Precision<br>(%) | Accuracy<br>(%) | Measured value<br>(ng mL <sup>-1</sup> ) | Precision<br>(%) | Accuracy<br>(%) |
| 0.3125                                      | 0.32 (0.02)                              | 5.2              | 103             | 0.34 (0.01)                              | 3.7              | 108             |
| 2.5                                         | 2.61 (0.11)                              | 4.1              | 104             | 2.58 (0.11)                              | 4.4              | 103             |
| 10                                          | 10.14 (0.73)                             | 7.2              | 101             | 9.15 (0.42)                              | 4.6              | 91              |

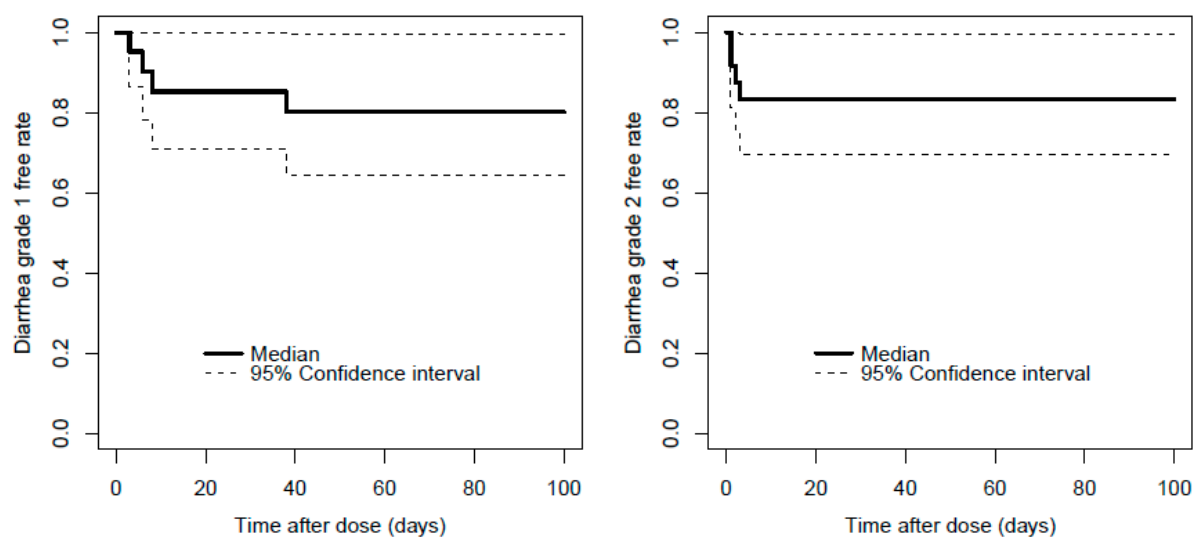

**Supplementary Figure S1.** Time between bortezomib dosing and emergence of diarrhea stratified by grading. Left, diarrhea grade 1. Right, diarrhea grade 2.
